# Supplementary material for: Anion effect on the redox properties of copper ions in ionic liquids and deep eutectic solvents
Source: Royal Society of Chemistry journal article supplement (doi:10.1039/d2cp04389k), 2023-01-01
Supplement: d2cp04389k1.pdf [file d2cp04389k1.pdf]

## Anion effect on the redox properties of copper ions in ionic liquids and deep eutectic solvents

Evangelia Daskalopoulou, Jennifer M. Hartley,\* Rodolfo Marin Rivera, Guillaume Zante,  
Andrew P. Abbott

*School of Chemistry, University of Leicester, Leicester, LE1 7RH, UK*

\* [jmh84@le.ac.uk](mailto:jmh84@le.ac.uk)

### Supplementary Information

a)

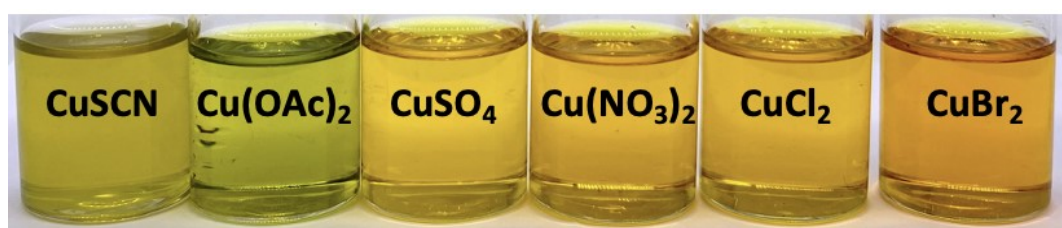

b)

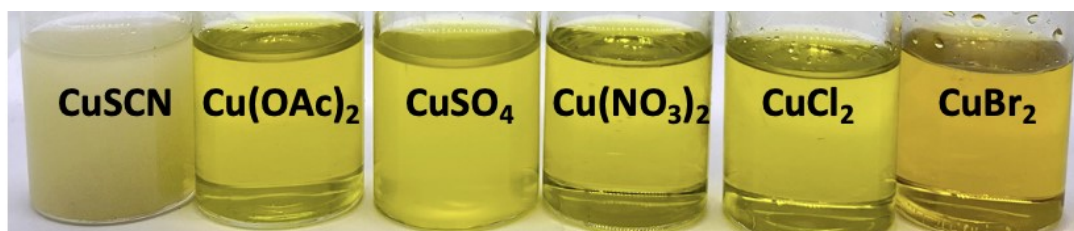

**Figure S1:** Photos of the different copper salts in: a) EG: ChCl, and b) CaCl<sub>2</sub>·6H<sub>2</sub>O: EG. The copper salt concentration was 0.02 mol dm<sup>-3</sup>.

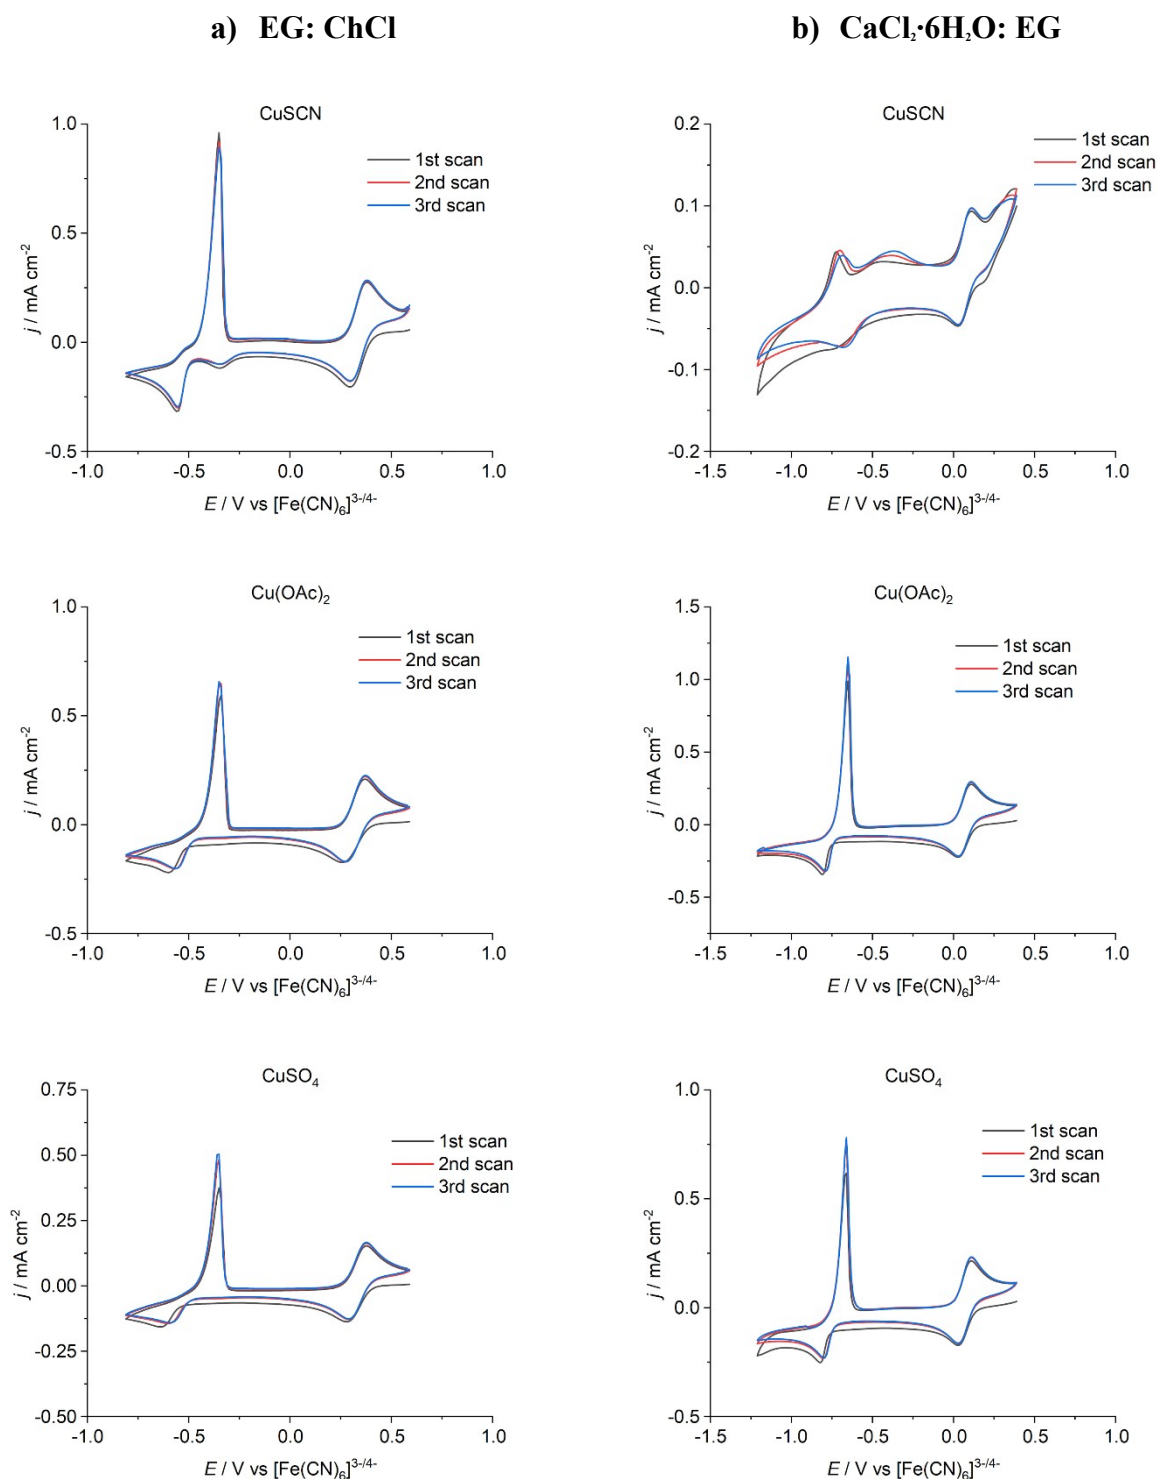

**Figure S2:** Cyclic voltammograms of the different copper salts (each  $0.02 \text{ mol dm}^{-3}$ ) in: a) EG: ChCl, and b)  $\text{CaCl}_2 \cdot 6\text{H}_2\text{O}$ : EG at a  $0.5 \text{ mm}$  diameter Pt-disc, referenced to the  $[\text{Fe}(\text{CN})_6]^{3-/4-}$  redox couple, with a scan rate of  $20 \text{ mV s}^{-1}$ . Temperature =  $20 \text{ }^\circ\text{C}$ . Presented data is the full set of scans for each system measured.

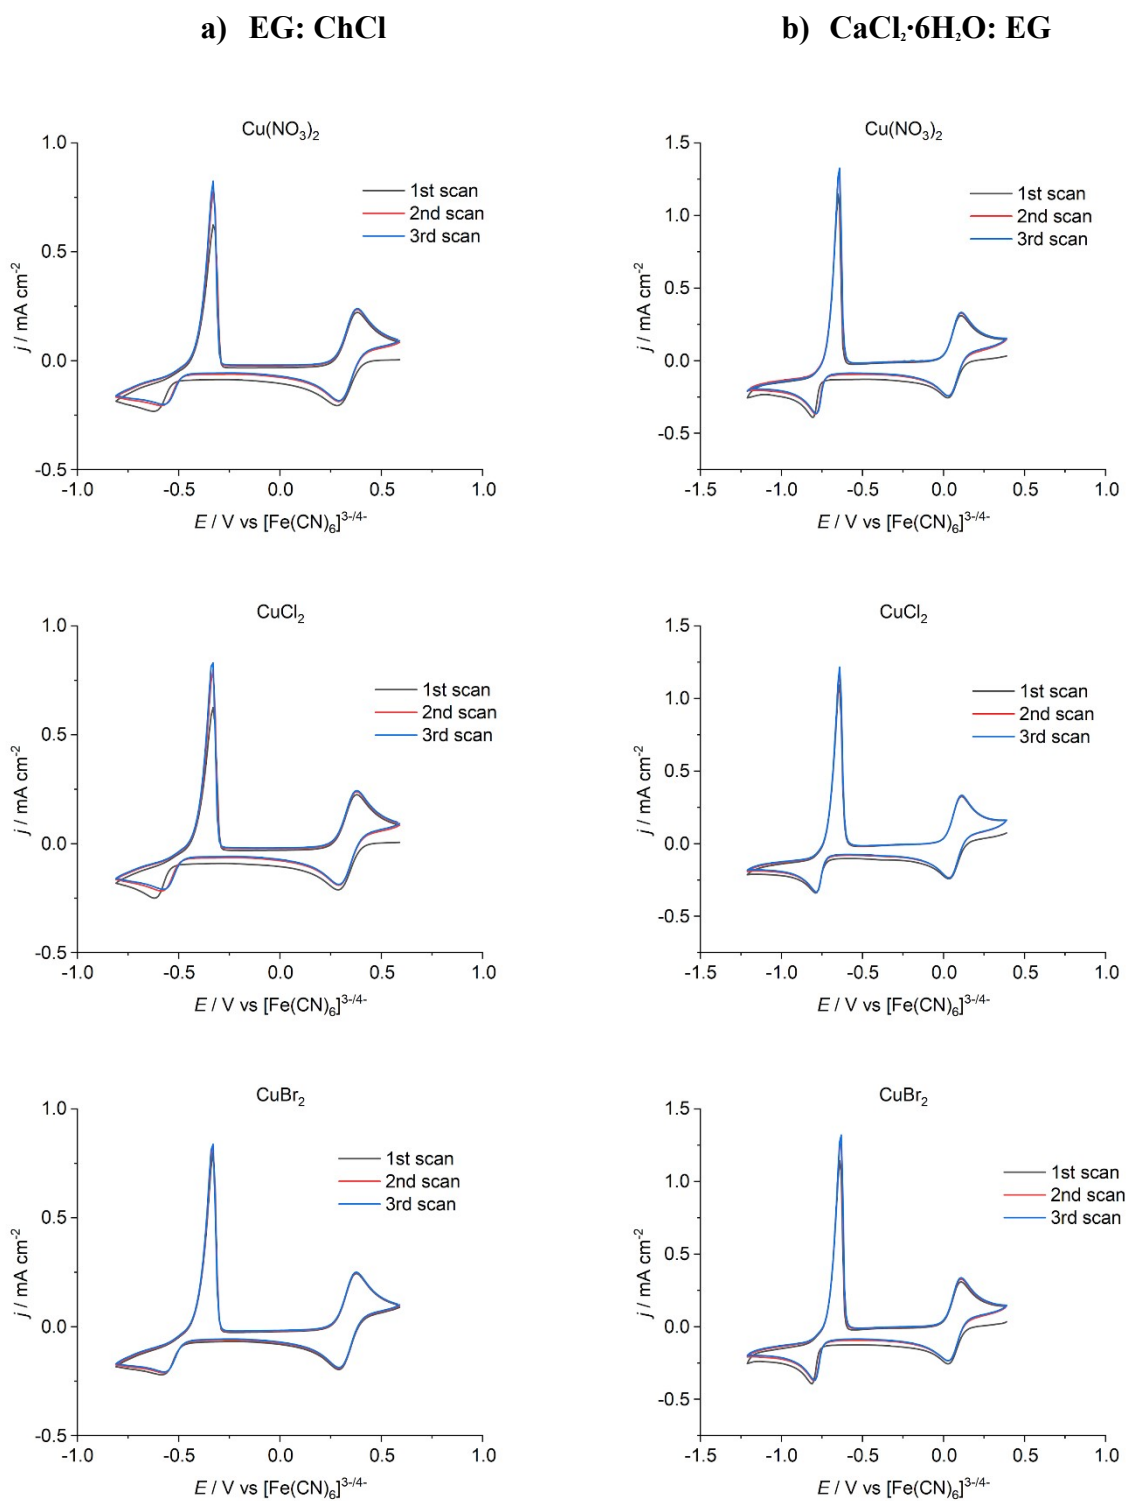

**Figure S2 (cont.):** Cyclic voltammograms of the different copper salts (each  $0.02 \text{ mol dm}^{-3}$ ) in: a) EG: ChCl, and b)  $\text{CaCl}_2 \cdot 6\text{H}_2\text{O}$ : EG at a  $0.5 \text{ mm}$  diameter Pt-disc, referenced to the  $[\text{Fe}(\text{CN})_6]^{3-/4-}$  redox couple, with a scan rate of  $20 \text{ mV s}^{-1}$ . Temperature =  $20 \text{ }^\circ\text{C}$ . Presented data is the full set of scans for each system measured.

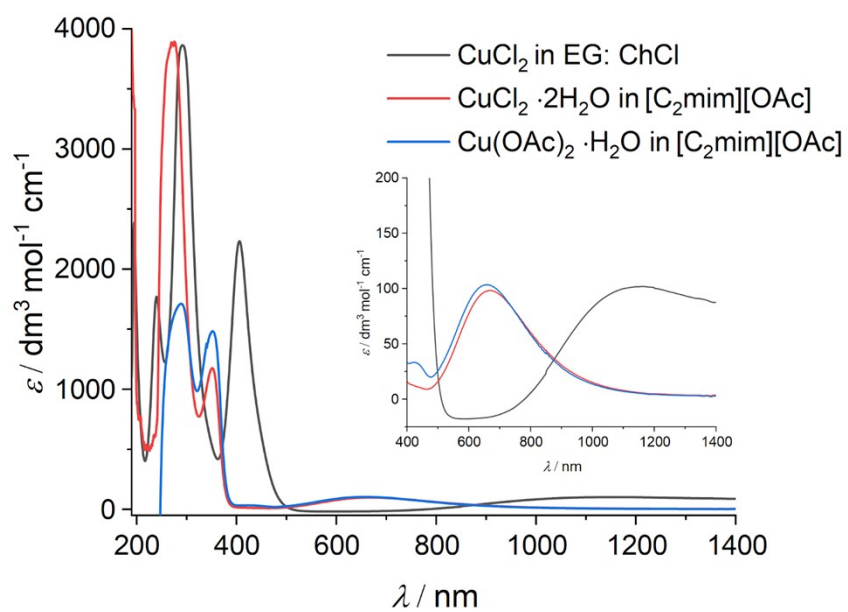

**Figure S3:** UV-vis spectra of copper(II) chloride dihydrate and copper(II) acetate hydrate in  $[\text{C}_2\text{mim}][\text{OAc}]$ , with spectrum of copper(II) chloride dihydrate in EG: ChCl for comparison. Inset are the expanded d-d transitions.

a)

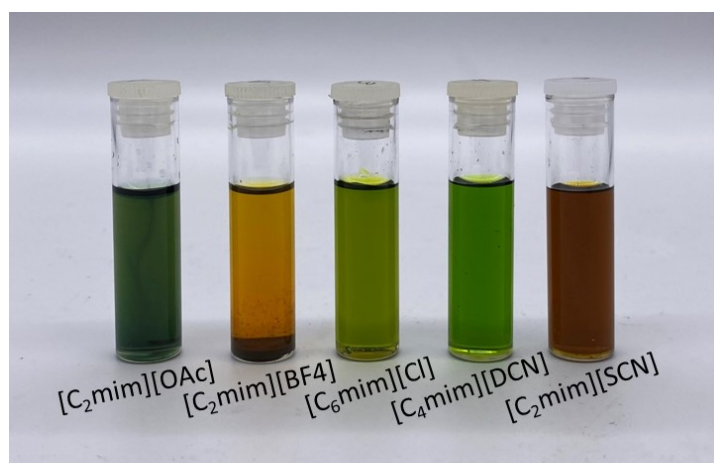

b)

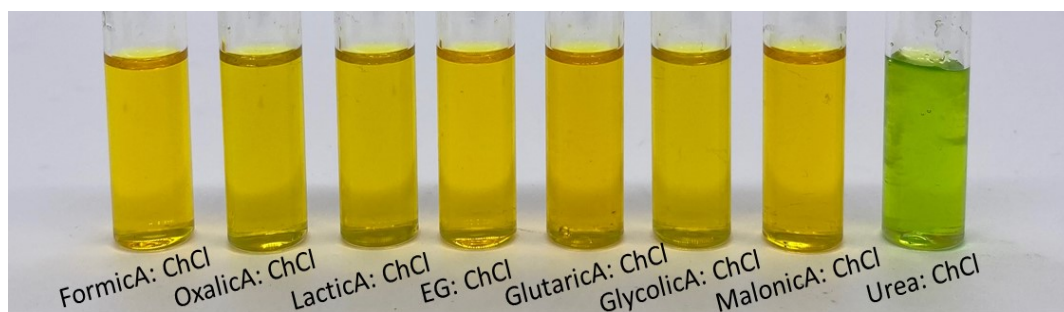

**Figure S4:** Photos of copper(II) chloride in: a) five different imidazolium-based ILs, and b) in eight DESs formed with different HBDS. The copper(II) chloride concentration was  $0.02 \text{ mol dm}^{-3}$ .

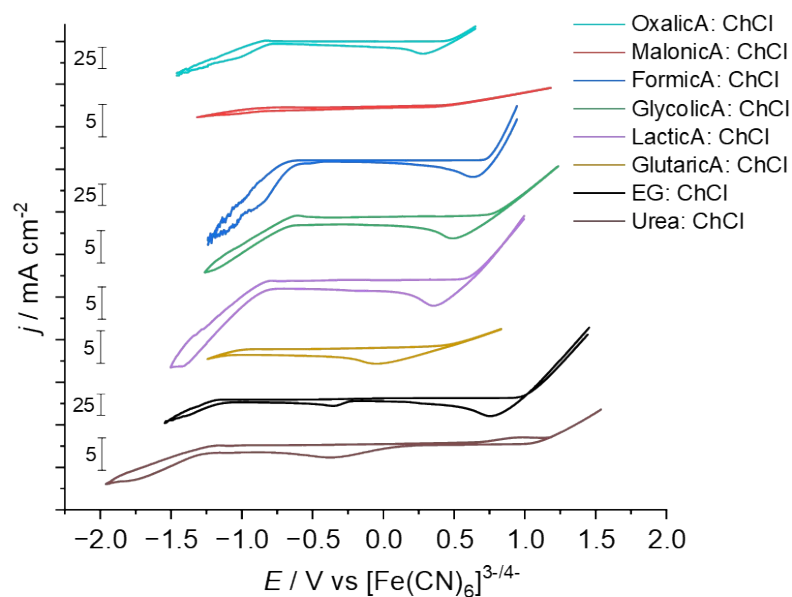

**Figure S5:** Voltammograms of the eight pure DESs measured at a Pt-disc working electrode, at a scan rate of  $20 \text{ mV s}^{-1}$ . CVs are referenced to the  $[\text{Fe}(\text{CN})_6]^{3-/4-}$  redox couple. Temperature =  $20 \text{ }^\circ\text{C}$ . CVs are offset for clarity.

**Table S1:** Absorbance maxima for the different copper salts dissolved in EG: ChCl and  $\text{CaCl}_2 \cdot 6\text{H}_2\text{O}$ : EG. Absorbance maxima present as shoulders or broad peaks are estimated and shown in italics.

| Salt        | Absorbance / nm |       |       | Absorbance / nm                                        |       |       |
|-------------|-----------------|-------|-------|--------------------------------------------------------|-------|-------|
|             | (EG: ChCl)      |       |       | $(\text{CaCl}_2 \cdot 6\text{H}_2\text{O}: \text{EG})$ |       |       |
| Acetate     | 238.8           | 291.6 | 405.4 | <i>ca. 232</i>                                         | 277.4 | 389.4 |
| Bromide     | 239.6           | 291.2 | 406.2 | <i>ca. 235</i>                                         | 280.4 | 390.4 |
| Chloride    | 239.8           | 291.8 | 406.4 | <i>ca. 235</i>                                         | 280.4 | 391.0 |
| Nitrate     | <i>ca. 239</i>  | 291.6 | 406.4 | –                                                      | 279.2 | 390.2 |
| Sulfate     | 239.2           | 291.2 | 406.0 | <i>ca. 234</i>                                         | 279.0 | 389.4 |
| Thiocyanate | –               | 269.8 | 406.4 | –                                                      | 263.8 | 391.4 |

**Table S2:** Absorbance maxima for copper(II) chloride in different ionic liquids. Absorbance maxima present as shoulders or broad peaks are estimated and shown in italics.

| Solvent                                 |                | Absorbance / nm  |       |
|-----------------------------------------|----------------|------------------|-------|
| [C <sub>2</sub> mim][OAc]               | –              | <i>ca. 275.5</i> | 351.5 |
| [C <sub>2</sub> mim][BF <sub>4</sub> ]  | <i>ca. 249</i> | 285              | 402.6 |
| [C <sub>6</sub> mim][Cl]                | –              | 290              | 407.5 |
| [C <sub>4</sub> mim][DCN]               | –              | <i>ca. 290</i>   | 369   |
| [C <sub>4</sub> mim][HSO <sub>4</sub> ] | <i>ca. 289</i> | <i>ca. 304</i>   | 482   |
| [C <sub>2</sub> mim][SCN]               | –              | <i>ca. 274</i>   | 399   |

**Table S3:** Absorbance maxima for copper(II) chloride in ChCl-based DESs with different HBDs, presented in order of relative acidity. Absorbance maxima present as shoulders or broad peaks are estimated and shown in italics.

| <b>HBD</b>                   |                | <b>Absorbance / nm</b> |       |
|------------------------------|----------------|------------------------|-------|
| <b>Oxalic acid dihydrate</b> | –              | 287                    | 403   |
| <b>Malonic acid</b>          | –              | 291.2                  | 405   |
| <b>Malic acid</b>            | <i>ca. 244</i> | 291                    | 404.8 |
| <b>Mandelic acid</b>         | –              | 291.6                  | 407.2 |
| <b>Formic acid</b>           | 242            | 291                    | 405   |
| <b>Glycolic acid</b>         | 239.2          | 290.4                  | 405   |
| <b>Lactic acid</b>           | 243.2          | 290.8                  | 404.8 |
| <b>Glutaric acid</b>         | 240.6          | 291.4                  | 405.2 |
| <b>Ethylene glycol</b>       | 239.8          | 291.8                  | 406.4 |
| <b>Urea</b>                  | <i>ca. 241</i> | 274.5                  | 401.5 |
